# Supplementary material for: Excess Folic Acid Supplementation Before and During Pregnancy and Lactation Activates Fos Gene Expression and Alters Behaviors in Male Mouse Offspring
Source: Front Neurosci. 2019 Apr 5;13:313. doi: 10.3389/fnins.2019.00313 (PMC6460239; doi:10.3389/fnins.2019.00313)
Supplement: Supplementary file 3 [file Table_2.XLS]

## Sheet: Sheet1
Table S2. Differential expressed genes in HFA compared to control at P21d
GeneID	GeneName	Locus	Con_FPKM	HFA_FPKM	log2(HFA/Con)	up-or-down	p_value	q_value	Description
ENSMUSG00000084890	A830036E02Rik	11:99415665-99425497	0.0971897	3.43127	5.14179	up	5e-05	0.00420532	-
ENSMUSG00000078877	Gm14295	2:176798611-176811223	0.834554	14.793	4.14776	up	5e-05	0.00420532	predicted gene 14295 [Source:MGI Symbol;Acc:MGI:3709624]
ENSMUSG00000044176	Spink10	18:62548910-62741387	2.74354	16.6641	2.60263	up	5e-05	0.00420532	serine peptidase inhibitor, Kazal type 10 [Source:MGI Symbol;Acc:MGI:3584533]
ENSMUSG00000071757	Zhx2	15:57694664-57839832	4.37809	26.1157	2.57654	up	5e-05	0.00420532	zinc fingers and homeoboxes 2 [Source:MGI Symbol;Acc:MGI:2683087]
ENSMUSG00000058126	Tpm3-rs7	14:113314607-113316713	4.3814	25.9629	2.56699	up	5e-05	0.00420532	tropomyosin 3, related sequence 7 [Source:MGI Symbol;Acc:MGI:99705]
ENSMUSG00000035383	Pmch	10:88091071-88146941	9.35667	53.5257	2.51616	up	0.00095	0.0429183	pro-melanin-concentrating hormone [Source:MGI Symbol;Acc:MGI:97629]
ENSMUSG00000028487	Bnc2	4:84275094-84675275	0.460865	2.45775	2.41492	up	5e-05	0.00420532	basonuclin 2 [Source:MGI Symbol;Acc:MGI:2443805]
ENSMUSG00000044827	Tlr1	5:64924678-64933563	0.174257	0.896456	2.36302	up	0.0002	0.013122	toll-like receptor 1 [Source:MGI Symbol;Acc:MGI:1341295]
ENSMUSG00000020884	Asgr1	11:70054084-70057894	0.280192	1.24968	2.15707	up	0.0002	0.013122	asialoglycoprotein receptor 1 [Source:MGI Symbol;Acc:MGI:88081]
ENSMUSG00000021464	Ror2	13:53109311-53286124	0.269579	1.12553	2.06183	up	5e-05	0.00420532	receptor tyrosine kinase-like orphan receptor 2 [Source:MGI Symbol;Acc:MGI:1347521]
ENSMUSG00000072591	5930412G12Rik	5:128579105-128600693	0.673276	2.43665	1.85563	up	0.00035	0.0201978	-
ENSMUSG00000005107	Slc2a9	5:38349272-38503143	0.185508	0.655665	1.82147	up	0.0003	0.0179004	solute carrier family 2 (facilitated glucose transporter), member 9 [Source:MGI Symbol;Acc:MGI:2152844]
ENSMUSG00000085558	4930412C18Rik	4:9770584-9823411	0.372245	1.30401	1.80864	up	0.0002	0.013122	-
ENSMUSG00000041828	Abca8a	11:110025633-110095978	0.404737	1.39946	1.78981	up	0.00095	0.0429183	ATP-binding cassette, sub-family A (ABC1), member 8a [Source:MGI Symbol;Acc:MGI:2386846]
ENSMUSG00000041649	Klf8	X:153237465-153396132	1.20236	3.44956	1.52054	up	5e-05	0.00420532	Kruppel-like factor 8 [Source:MGI Symbol;Acc:MGI:2442430]
ENSMUSG00000021848	Otx2	14:48657678-48667644	2.12657	5.91778	1.47653	up	5e-05	0.00420532	orthodenticle homolog 2 [Source:MGI Symbol;Acc:MGI:97451]
ENSMUSG00000054728	Phactr1	13:42680622-43138526	284.479	736.983	1.37331	up	5e-05	0.00420532	phosphatase and actin regulator 1 [Source:MGI Symbol;Acc:MGI:2659021]
ENSMUSG00000015852	Fcrls	3:87250757-87263738	3.50721	9.05812	1.36889	up	5e-05	0.00420532	Fc receptor-like S, scavenger receptor [Source:MGI Symbol;Acc:MGI:1933397]
ENSMUSG00000091722	Siah3	14:75455981-75526141	2.03086	5.20055	1.35657	up	0.00115	0.0487501	seven in absentia homolog 3 (Drosophila) [Source:MGI Symbol;Acc:MGI:2685758]
ENSMUSG00000100147	1700047M11Rik	1:182287989-182303325	4.45659	11.2295	1.33328	up	0.00035	0.0201978	-
ENSMUSG00000029304	Spp1	5:104435117-104441050	6.72821	16.3582	1.28172	up	5e-05	0.00420532	secreted phosphoprotein 1 [Source:MGI Symbol;Acc:MGI:98389]
ENSMUSG00000030108	Slc6a13	6:121300226-121337733	2.84688	6.89577	1.27633	up	5e-05	0.00420532	solute carrier family 6 (neurotransmitter transporter, GABA), member 13 [Source:MGI Symbol;Acc:MGI:95629]
ENSMUSG00000078870	Gm14410	2:177183452-177206421	6.9739	16.0742	1.20471	up	5e-05	0.00420532	predicted gene 14410 [Source:MGI Symbol;Acc:MGI:3709158]
ENSMUSG00000004894	Hapln2	3:88021749-88027583	11.9044	26.8238	1.17202	up	5e-05	0.00420532	hyaluronan and proteoglycan link protein 2 [Source:MGI Symbol;Acc:MGI:2137300]
ENSMUSG00000037686	Aspg	12:112106682-112127573	1.1806	2.65335	1.1683	up	0.0003	0.0179004	asparaginase [Source:MGI Symbol;Acc:MGI:2144822]
ENSMUSG00000009075	Cabp7	11:4704677-4746778	16.7222	36.9285	1.14297	up	5e-05	0.00420532	calcium binding protein 7 [Source:MGI Symbol;Acc:MGI:2183437]
ENSMUSG00000013584	Aldh1a2	9:71215788-71296243	2.5748	5.68198	1.14194	up	5e-05	0.00420532	aldehyde dehydrogenase family 1, subfamily A2 [Source:MGI Symbol;Acc:MGI:107928]
ENSMUSG00000047109	Cldn14	16:93919030-94008837	2.06984	4.56088	1.1398	up	0.00085	0.03953	claudin 14 [Source:MGI Symbol;Acc:MGI:1860425]
ENSMUSG00000040272	Accs	2:93833466-93849943	0.876026	1.92297	1.13429	up	0.00115	0.0487501	1-aminocyclopropane-1-carboxylate synthase (non-functional) [Source:MGI Symbol;Acc:MGI:1919717]
ENSMUSG00000035783	Acta2	19:34241089-34255336	2.54968	5.49398	1.10754	up	0.0003	0.0179004	actin, alpha 2, smooth muscle, aorta [Source:MGI Symbol;Acc:MGI:87909]
ENSMUSG00000048106	4632415L05Rik	3:19894885-19898984	4.23228	9.03024	1.09333	up	0.0002	0.013122	-
ENSMUSG00000029675	Eln	5:134702592-134822967	6.51647	13.8316	1.08581	up	5e-05	0.00420532	elastin [Source:MGI Symbol;Acc:MGI:95317]
ENSMUSG00000018830	Myh11	16:14194526-14291408	0.373116	0.775735	1.05594	up	0.0007	0.0339521	myosin, heavy polypeptide 11, smooth muscle [Source:MGI Symbol;Acc:MGI:102643]
ENSMUSG00000037166	Ppp1r14a	7:29289307-29293801	12.7627	25.7832	1.0145	up	5e-05	0.00420532	protein phosphatase 1, regulatory (inhibitor) subunit 14A [Source:MGI Symbol;Acc:MGI:1931139]
ENSMUSG00000098912	1500004A13Rik	3:88775215-88832547	16.6536	0.357402	-5.54214	down	5e-05	0.00420532	-
ENSMUSG00000056023	Gm9989	3:81918007-81924463	4.94782	0.109117	-5.50284	down	5e-05	0.00420532	-
ENSMUSG00000018126	Baiap2l2	15:79258194-79285537	6.12911	0.71815	-3.09332	down	5e-05	0.00420532	BAI1-associated protein 2-like 2 [Source:MGI Symbol;Acc:MGI:2652819]
ENSMUSG00000027379	Bub1	2:127801121-127831865	0.936649	0.149778	-2.64468	down	5e-05	0.00420532	BUB1, mitotic checkpoint serine/threonine kinase [Source:MGI Symbol;Acc:MGI:1100510]
ENSMUSG00000090394	4930523C07Rik	1:160044381-160080208	1.9039	0.344174	-2.46775	down	0.0001	0.00760192	RIKEN cDNA 4930523C07 gene [Source:MGI Symbol;Acc:MGI:1914897]
ENSMUSG00000100515	Gm17916	1:115668987-115684624	3.00441	0.590435	-2.34723	down	0.0002	0.013122	predicted gene, 17916 [Source:MGI Symbol;Acc:MGI:5010101]
ENSMUSG00000073130	Gm1141	X:71928815-71940870	0.816511	0.181562	-2.16901	down	0.00115	0.0487501	predicted gene 1141 [Source:MGI Symbol;Acc:MGI:2685987]
ENSMUSG00000100131	Gm28439	1:24611534-24612700	180.668	43.603	-2.05084	down	5e-05	0.00420532	predicted gene 28439 [Source:MGI Symbol;Acc:MGI:5579145]
ENSMUSG00000035258	Abi3bp	16:56477845-56690128	3.07601	0.808986	-1.92687	down	5e-05	0.00420532	ABI gene family, member 3 (NESH) binding protein [Source:MGI Symbol;Acc:MGI:2444583]
ENSMUSG00000068696	Gpr88	3:116249653-116253503	137.687	36.8166	-1.90296	down	5e-05	0.00420532	G-protein coupled receptor 88 [Source:MGI Symbol;Acc:MGI:1927653]
ENSMUSG00000032551	1110059G10Rik	9:122945088-122951000	7.45044	1.99231	-1.90288	down	5e-05	0.00420532	RIKEN cDNA 1110059G10 gene [Source:MGI Symbol;Acc:MGI:1913452]
ENSMUSG00000059897	Zfp930	8:69226342-69228980	1.82275	0.494902	-1.8809	down	0.00015	0.0105413	zinc finger protein 930 [Source:MGI Symbol;Acc:MGI:2675306]
ENSMUSG00000032446	Eomes	9:118478211-118486132	1.11065	0.309993	-1.8411	down	0.00035	0.0201978	eomesodermin [Source:MGI Symbol;Acc:MGI:1201683]
ENSMUSG00000057457	Phex	X:157162074-157415312	0.643347	0.182808	-1.81527	down	0.0003	0.0179004	phosphate regulating endopeptidase homolog, X-linked [Source:MGI Symbol;Acc:MGI:107489]
ENSMUSG00000070780	Rbm47	5:66016548-66191336	0.526499	0.16023	-1.71628	down	0.00075	0.0358278	RNA binding motif protein 47 [Source:MGI Symbol;Acc:MGI:2384294]
ENSMUSG00000020178	Adora2a	10:75316942-75334788	40.8251	12.6936	-1.68535	down	5e-05	0.00420532	adenosine A2a receptor [Source:MGI Symbol;Acc:MGI:99402]
ENSMUSG00000030994	D7Ertd443e	7:134265778-134385661	3.99106	1.2462	-1.67924	down	5e-05	0.00420532	DNA segment, Chr 7, ERATO Doi 443, expressed [Source:MGI Symbol;Acc:MGI:1196431]
ENSMUSG00000021478	Drd1	13:54051185-54055658	22.1562	7.00357	-1.66155	down	5e-05	0.00420532	dopamine receptor D1 [Source:MGI Symbol;Acc:MGI:99578]
ENSMUSG00000057719	Sh3rf2	18:42053666-42158960	2.20843	0.737447	-1.58241	down	5e-05	0.00420532	SH3 domain containing ring finger 2 [Source:MGI Symbol;Acc:MGI:2444628]
ENSMUSG00000046922	Gpr6	10:41069988-41072285	20.4423	6.83056	-1.58148	down	5e-05	0.00420532	G protein-coupled receptor 6 [Source:MGI Symbol;Acc:MGI:2155249]
ENSMUSG00000019865	Nmbr	10:14705590-14770850	5.11345	1.78328	-1.51976	down	0.0008	0.03776	neuromedin B receptor [Source:MGI Symbol;Acc:MGI:1100525]
ENSMUSG00000061718	Ppp1r1b	11:98348403-98358283	255.239	89.546	-1.51115	down	5e-05	0.00420532	protein phosphatase 1, regulatory (inhibitor) subunit 1B [Source:MGI Symbol;Acc:MGI:94860]
ENSMUSG00000074264	Amy1	3:113555709-113630149	17.3807	6.25129	-1.47526	down	0.00105	0.0458635	amylase 1, salivary [Source:MGI Symbol;Acc:MGI:88019]
ENSMUSG00000045573	Penk	4:4133530-4188703	377.097	139.308	-1.43666	down	5e-05	0.00420532	preproenkephalin [Source:MGI Symbol;Acc:MGI:104629]
ENSMUSG00000037727	Avp	2:130580619-130582554	22.2848	8.24532	-1.43441	down	5e-05	0.00420532	arginine vasopressin [Source:MGI Symbol;Acc:MGI:88121]
ENSMUSG00000102692	Dchs2	3:83125275-83357209	0.659693	0.24489	-1.42966	down	0.00015	0.0105413	dachsous 2 (Drosophila) [Source:MGI Symbol;Acc:MGI:2685263]
ENSMUSG00000017491	Rarb	14:16430841-16575472	12.6358	4.79387	-1.39826	down	5e-05	0.00420532	retinoic acid receptor, beta [Source:MGI Symbol;Acc:MGI:97857]
ENSMUSG00000071341	Egr4	6:85511120-85513589	33.6618	13.1742	-1.3534	down	5e-05	0.00420532	early growth response 4 [Source:MGI Symbol;Acc:MGI:99252]
ENSMUSG00000029755	Dlx5	6:6877804-6882085	10.4805	4.1826	-1.32524	down	5e-05	0.00420532	distal-less homeobox 5 [Source:MGI Symbol;Acc:MGI:101926]
ENSMUSG00000061762	Tac1	6:7554878-7565834	107.177	42.8022	-1.32423	down	5e-05	0.00420532	tachykinin 1 [Source:MGI Symbol;Acc:MGI:98474]
ENSMUSG00000062931	Zfp938	10:82224849-82241280	3.91318	1.57001	-1.31757	down	5e-05	0.00420532	zinc finger protein 938 [Source:MGI Symbol;Acc:MGI:3621440]
ENSMUSG00000007877	Tcap	11:98383810-98384953	5.32334	2.14043	-1.31443	down	0.00035	0.0201978	titin-cap [Source:MGI Symbol;Acc:MGI:1330233]
ENSMUSG00000035776	Cd99l2	X:71420059-71492849	83.5759	34.6509	-1.2702	down	5e-05	0.00420532	CD99 antigen-like 2 [Source:MGI Symbol;Acc:MGI:2177151]
ENSMUSG00000078137	Ankrd63	2:118699102-118703963	15.2276	6.49311	-1.22971	down	5e-05	0.00420532	ankyrin repeat domain 63 [Source:MGI Symbol;Acc:MGI:2686183]
ENSMUSG00000078958	Atp6ap1l	13:90883432-90905355	6.86579	2.92975	-1.22865	down	0.0002	0.013122	ATPase, H+ transporting, lysosomal accessory protein 1-like [Source:MGI Symbol;Acc:MGI:3648665]
ENSMUSG00000090877	Hspa1b	17:34956435-34959238	7.20781	3.09873	-1.21789	down	5e-05	0.00420532	heat shock protein 1B [Source:MGI Symbol;Acc:MGI:99517]
ENSMUSG00000027400	Pdyn	2:129686564-129699844	27.1031	11.6609	-1.21677	down	5e-05	0.00420532	prodynorphin [Source:MGI Symbol;Acc:MGI:97535]
ENSMUSG00000022769	Sdf2l1	16:17130137-17132383	27.6568	11.9413	-1.21168	down	5e-05	0.00420532	stromal cell-derived factor 2-like 1 [Source:MGI Symbol;Acc:MGI:2149842]
ENSMUSG00000048120	Entpd1	19:40612365-40741602	43.9933	19.1704	-1.1984	down	0.0001	0.00760192	ectonucleoside triphosphate diphosphohydrolase 1 [Source:MGI Symbol;Acc:MGI:102805]
ENSMUSG00000074165	Zfp788	7:41633202-41651530	12.3829	5.40591	-1.19574	down	5e-05	0.00420532	zinc finger protein 788 [Source:MGI Symbol;Acc:MGI:1914857]
ENSMUSG00000037868	Egr2	10:67535474-67542188	2.6305	1.15081	-1.19268	down	0.0001	0.00760192	early growth response 2 [Source:MGI Symbol;Acc:MGI:95296]
ENSMUSG00000073062	Zxdb	X:94724568-94730187	2.47557	1.08553	-1.18936	down	5e-05	0.00420532	zinc finger, X-linked, duplicated B [Source:MGI Symbol;Acc:MGI:3694898]
ENSMUSG00000015843	Rxrg	1:167598383-167639623	8.47935	3.73841	-1.18153	down	5e-05	0.00420532	retinoid X receptor gamma [Source:MGI Symbol;Acc:MGI:98216]
ENSMUSG00000048240	Gng7	10:80948623-81014945	133.298	59.8708	-1.15473	down	5e-05	0.00420532	guanine nucleotide binding protein (G protein), gamma 7 [Source:MGI Symbol;Acc:MGI:95787]
ENSMUSG00000020599	Rgs9	11:109225354-109298129	42.9854	19.3666	-1.15028	down	5e-05	0.00420532	regulator of G-protein signaling 9 [Source:MGI Symbol;Acc:MGI:1338824]
ENSMUSG00000048562	Sp8	12:118846328-118852578	1.91747	0.866821	-1.1454	down	0.0007	0.0339521	trans-acting transcription factor 8 [Source:MGI Symbol;Acc:MGI:2443471]
ENSMUSG00000062933	Gm10123	9:96895657-96896147	30.379	13.7423	-1.14446	down	0.0004	0.0220376	predicted pseudogene 10123 [Source:MGI Symbol;Acc:MGI:3704342]
ENSMUSG00000052374	Actn2	13:12269425-12340760	8.38809	3.81921	-1.13507	down	5e-05	0.00420532	actinin alpha 2 [Source:MGI Symbol;Acc:MGI:109192]
ENSMUSG00000032259	Drd2	9:49340661-49407214	19.8174	9.1058	-1.12191	down	5e-05	0.00420532	dopamine receptor D2 [Source:MGI Symbol;Acc:MGI:94924]
ENSMUSG00000033972	Zfp944	17:22337988-22361400	1.85388	0.861018	-1.10643	down	0.00065	0.0319186	zinc finger protein 944 [Source:MGI Symbol;Acc:MGI:2442394]
ENSMUSG00000027210	Meis2	2:115863063-116065839	67.2194	31.7413	-1.08252	down	5e-05	0.00420532	Meis homeobox 2 [Source:MGI Symbol;Acc:MGI:108564]
ENSMUSG00000054871	Tmem158	9:123259057-123260789	145.224	68.8511	-1.07673	down	5e-05	0.00420532	transmembrane protein 158 [Source:MGI Symbol;Acc:MGI:1919559]
ENSMUSG00000071267	Zfp942	17:21926959-21962464	2.00673	0.953492	-1.07356	down	0.00115	0.0487501	zinc finger protein 942 [Source:MGI Symbol;Acc:MGI:1920483]
ENSMUSG00000050473	Slc35d3	10:19847916-19851459	6.23526	3.00873	-1.05129	down	5e-05	0.00420532	solute carrier family 35, member D3 [Source:MGI Symbol;Acc:MGI:1923407]
ENSMUSG00000058748	Zfp958	8:4613166-4630231	2.27457	1.10112	-1.04662	down	0.00055	0.0282357	zinc finger protein 958 [Source:MGI Symbol;Acc:MGI:2385298]
ENSMUSG00000038418	Egr1	18:34859822-34864984	97.029	47.0785	-1.04335	down	5e-05	0.00420532	early growth response 1 [Source:MGI Symbol;Acc:MGI:95295]
ENSMUSG00000045534	Kcna5	6:126532550-126535412	4.93235	2.39872	-1.04001	down	5e-05	0.00420532	potassium voltage-gated channel, shaker-related subfamily, member 5 [Source:MGI Symbol;Acc:MGI:96662]
ENSMUSG00000024317	Rnf138	18:21001340-21028223	2.72791	1.3326	-1.03355	down	0.0003	0.0179004	ring finger protein 138 [Source:MGI Symbol;Acc:MGI:1929211]
ENSMUSG00000069939	Gm12070	11:26786632-26787634	12.2053	5.99315	-1.02613	down	5e-05	0.00420532	predicted gene 12070 [Source:MGI Symbol;Acc:MGI:3650751]
ENSMUSG00000056854	Pou3f4	X:110814279-110817207	5.62701	2.79893	-1.00749	down	5e-05	0.00420532	POU domain, class 3, transcription factor 4 [Source:MGI Symbol;Acc:MGI:101894]
ENSMUSG00000038805	Six3	17:85600650-85629302	12.2238	6.08666	-1.00597	down	5e-05	0.00420532	sine oculis-related homeobox 3 [Source:MGI Symbol;Acc:MGI:102764]
ENSMUSG00000107747	Gm5881	6:96033002-96033369	1.74491	0	#NAME?	down	0.00095	0.0429183	predicted gene 5881 [Source:MGI Symbol;Acc:MGI:3779532]
